# Supplementary material for: Glucocorticoid treatment influences prostate cancer cell growth and the tumor microenvironment via altered glucocorticoid receptor signaling in prostate fibroblasts
Source: PubMed Central journal article supplement (PMC10798901; doi:10.1038/s41388-023-02901-5), 2023-11-29

A

## PCR gene array for ECM and adhesion genes

| genes    | Dex   |       |       |       |       | Pred  |       |       |       |       | Dex+Pred | statistics |
|----------|-------|-------|-------|-------|-------|-------|-------|-------|-------|-------|----------|------------|
|          | Exp 1 | Exp 2 | Exp 3 | Exp 4 | Exp 5 | Exp 1 | Exp 2 | Exp 3 | Exp 4 | Exp 5 |          |            |
| SPP1     |       |       |       |       |       |       |       |       |       |       | 22,5     | 0,3236     |
| CLEC3B   |       |       |       |       |       |       |       |       |       |       | 8,1      | 0,0025     |
| VCAN     |       |       |       |       |       |       |       |       |       |       | 4,0      | 0,1522     |
| COL8A1   |       |       |       |       |       |       |       |       |       |       | 3,6      | 0,0614     |
| FN1      |       |       |       |       |       |       |       |       |       |       | 3,3      | 0,0007     |
| COL7A1   |       |       |       |       |       |       |       |       |       |       | 3,2      | 0,0173     |
| CTGF     |       |       |       |       |       |       |       |       |       |       | 2,0      | 0,0629     |
| COL5A1   |       |       |       |       |       |       |       |       |       |       | 1,8      | 0,1791     |
| COL1A1   |       |       |       |       |       |       |       |       |       |       | 1,6      | 0,1483     |
| LAMA2    |       |       |       |       |       |       |       |       |       |       | 1,6      | 0,1629     |
| ITGA5    |       |       |       |       |       |       |       |       |       |       | 1,5      | 0,1494     |
| ITGB4    |       |       |       |       |       |       |       |       |       |       | 1,4      | 0,5249     |
| ADAMTS13 |       |       |       |       |       |       |       |       |       |       | 1,3      | 0,4871     |
| CDH1     |       |       |       |       |       |       |       |       |       |       | 1,2      | 0,4773     |
| ADAMTS1  |       |       |       |       |       |       |       |       |       |       | 1,2      | 0,5866     |
| COL6A2   |       |       |       |       |       |       |       |       |       |       | 0,8      | 0,4440     |
| CTNND1   |       |       |       |       |       |       |       |       |       |       | 0,8      | 0,0204     |
| ITGA1    |       |       |       |       |       |       |       |       |       |       | 0,8      | 0,0299     |
| TGFB1    |       |       |       |       |       |       |       |       |       |       | 0,8      | 0,1825     |
| SGCE     |       |       |       |       |       |       |       |       |       |       | 0,8      | 0,1685     |
| COL12A1  |       |       |       |       |       |       |       |       |       |       | 0,8      | 0,0151     |
| ITGB3    |       |       |       |       |       |       |       |       |       |       | 0,8      | 0,1471     |
| SPG7     |       |       |       |       |       |       |       |       |       |       | 0,8      | 0,1614     |
| LAMB1    |       |       |       |       |       |       |       |       |       |       | 0,7      | 0,1266     |
| CTNNA1   |       |       |       |       |       |       |       |       |       |       | 0,7      | 0,0002     |
| ITGAV    |       |       |       |       |       |       |       |       |       |       | 0,7      | 0,0015     |
| MMP2     |       |       |       |       |       |       |       |       |       |       | 0,6      | 0,0936     |
| VCAM1    |       |       |       |       |       |       |       |       |       |       | 0,6      | 0,0013     |
| CD44     |       |       |       |       |       |       |       |       |       |       | 0,6      | 0,0029     |
| MMP11    |       |       |       |       |       |       |       |       |       |       | 0,6      | 0,0206     |
| TIMP2    |       |       |       |       |       |       |       |       |       |       | 0,6      | 0,0000     |
| THBS2    |       |       |       |       |       |       |       |       |       |       | 0,5      | 0,0462     |
| MMP16    |       |       |       |       |       |       |       |       |       |       | 0,5      | 0,0022     |
| ECM1     |       |       |       |       |       |       |       |       |       |       | 0,4      | 0,0001     |
| ICAM1    |       |       |       |       |       |       |       |       |       |       | 0,4      | 0,0001     |
| LAMA3    |       |       |       |       |       |       |       |       |       |       | 0,4      | 0,0006     |
| ADAMTS8  |       |       |       |       |       |       |       |       |       |       | 0,4      | 0,0179     |
| ITGA4    |       |       |       |       |       |       |       |       |       |       | 0,4      | 0,0000     |
| TIMP1    |       |       |       |       |       |       |       |       |       |       | 0,4      | 0,0000     |
| ITGA2    |       |       |       |       |       |       |       |       |       |       | 0,4      | 0,0001     |
| LAMA1    |       |       |       |       |       |       |       |       |       |       | 0,3      | 0,0018     |
| TIMP3    |       |       |       |       |       |       |       |       |       |       | 0,3      | 0,0007     |
| ITGA6    |       |       |       |       |       |       |       |       |       |       | 0,3      | 0,0000     |
| VTN      |       |       |       |       |       |       |       |       |       |       | 0,3      | 0,0000     |
| TNC      |       |       |       |       |       |       |       |       |       |       | 0,3      | 0,0004     |
| MMP3     |       |       |       |       |       |       |       |       |       |       | 0,3      | 0,0003     |
| MMP10    |       |       |       |       |       |       |       |       |       |       | 0,3      | 0,1423     |
| ITGA8    |       |       |       |       |       |       |       |       |       |       | 0,2      | 0,0000     |
| ITGB2    |       |       |       |       |       |       |       |       |       |       | 0,2      | 0,0007     |
| ITGA7    |       |       |       |       |       |       |       |       |       |       | 0,2      | 0,0000     |
| MMP1     |       |       |       |       |       |       |       |       |       |       | 0,1      | 0,0008     |

B

## primary CAF

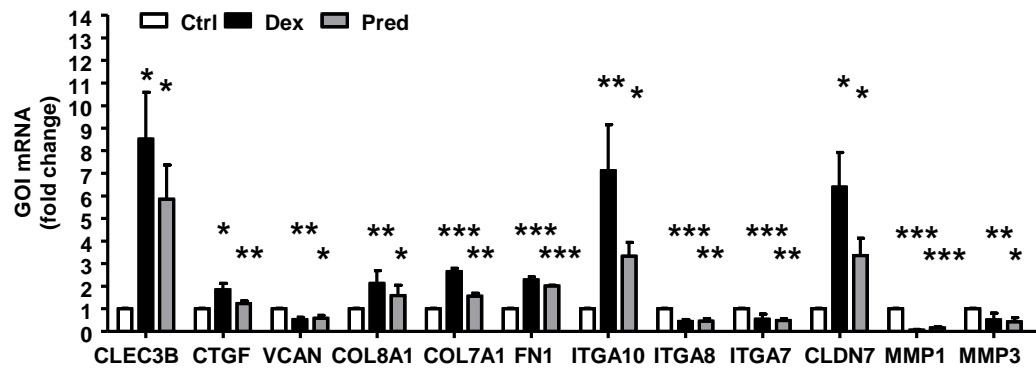

## PF179T-NAF

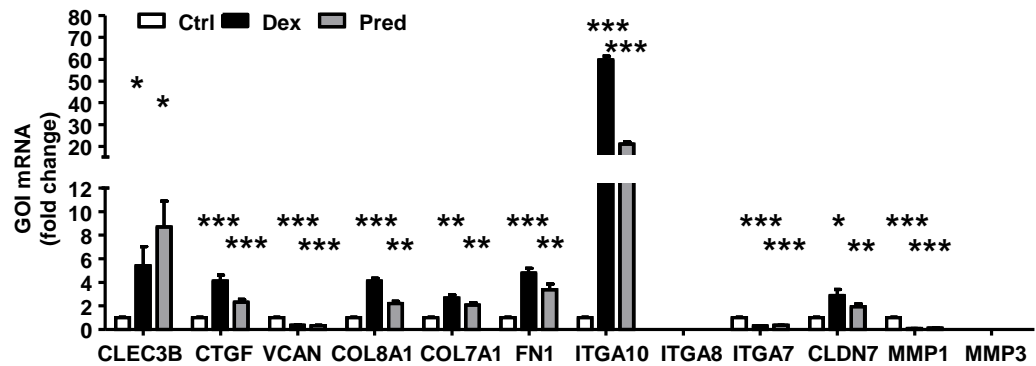

## primary NAF

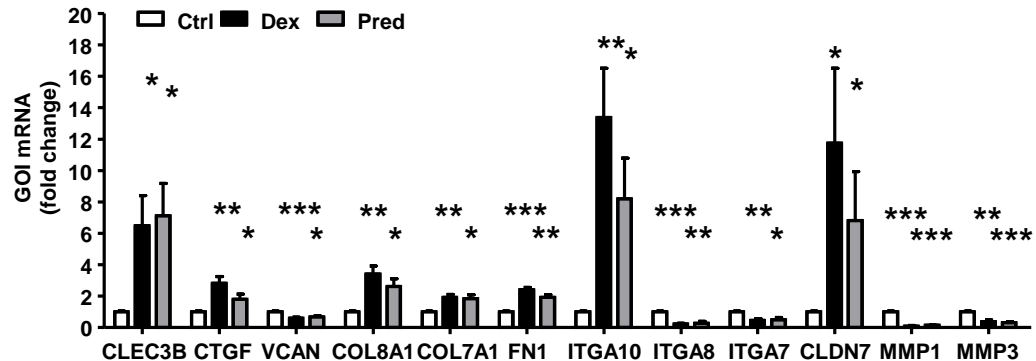

Supplement: 41388_2023_2901_MOESM5_ESM.pdf [file 41388_2023_2901_MOESM5_ESM.pdf]
