# Supplementary material for: Glucocorticoid treatment influences prostate cancer cell growth and the tumor microenvironment via altered glucocorticoid receptor signaling in prostate fibroblasts
Source: PubMed Central journal article supplement (PMC10798901; doi:10.1038/s41388-023-02901-5), 2023-11-29

### A Single cell RNAseq screen (benign/BPH prostate glands)

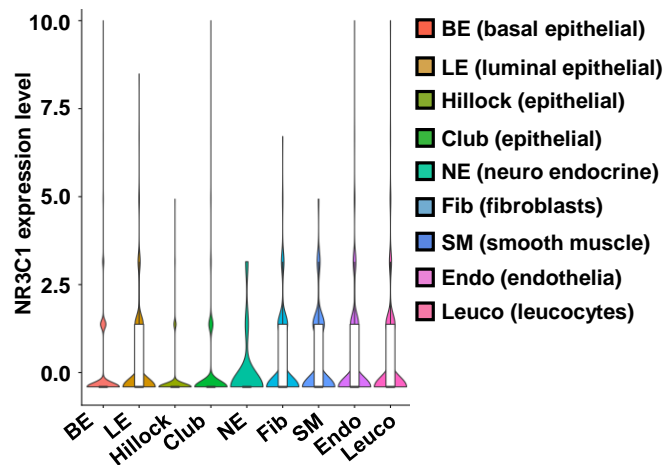

### C

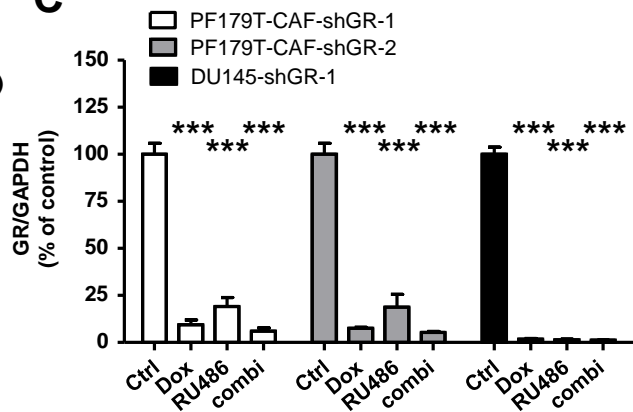

### D

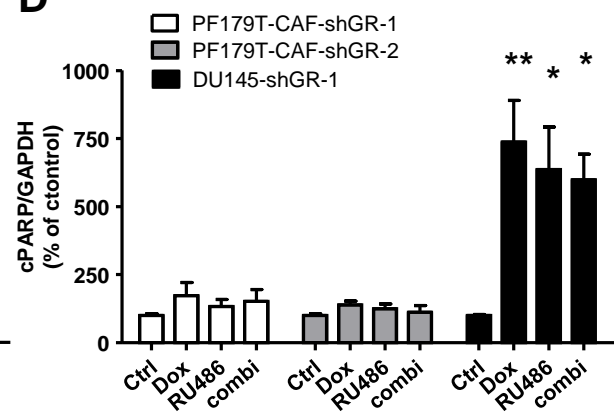

### B

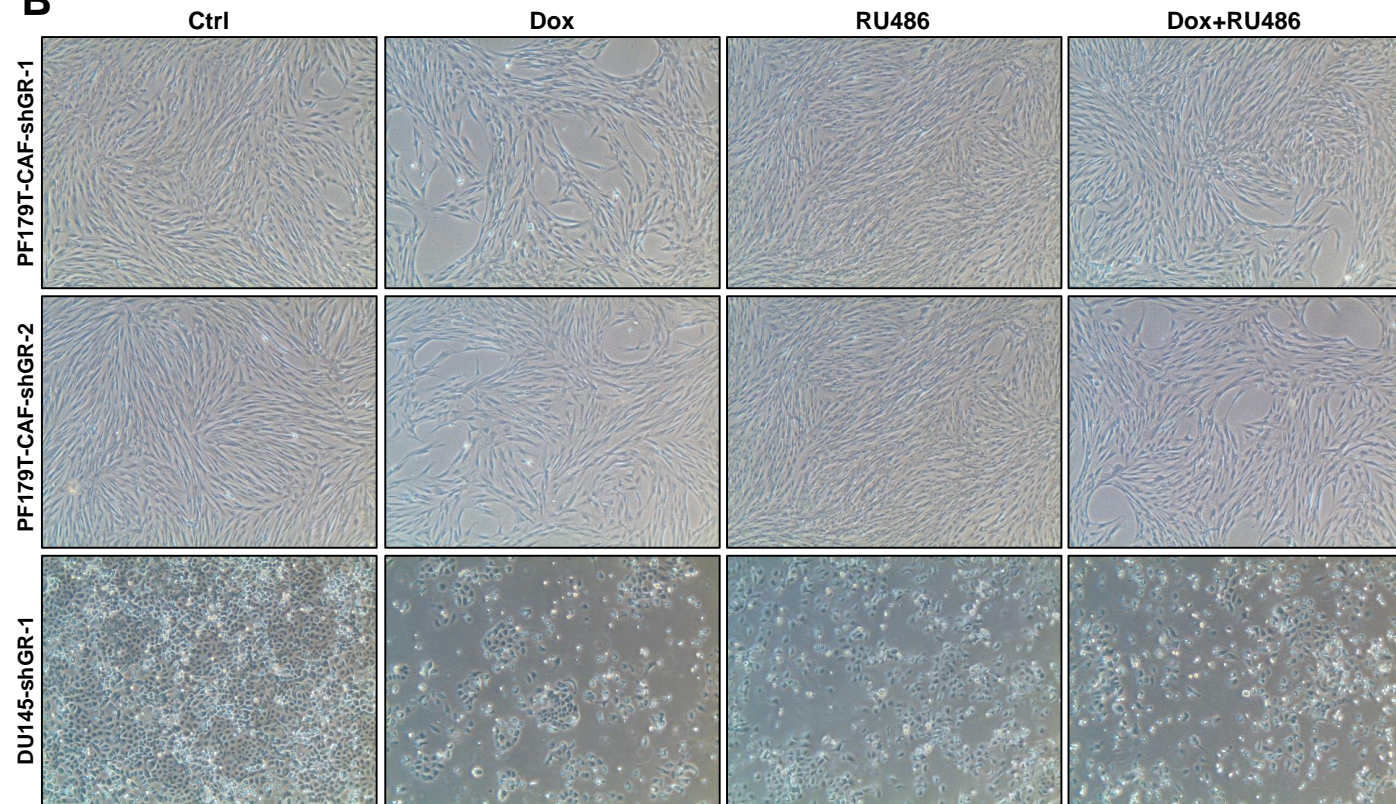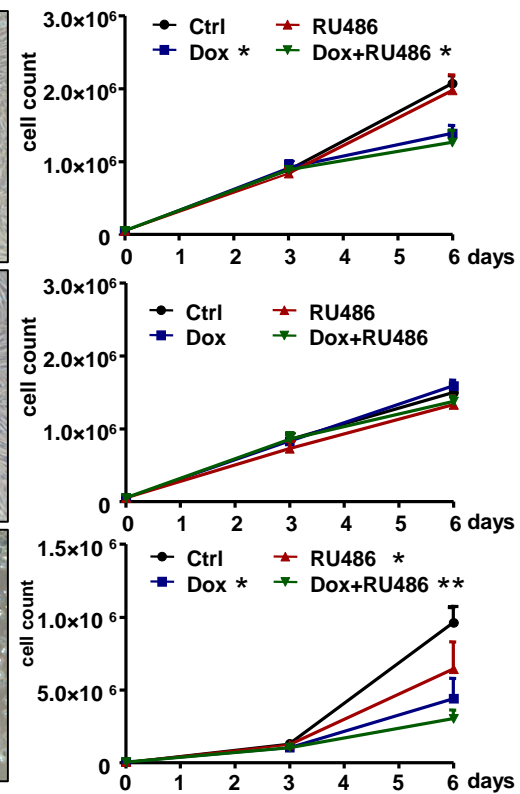

Supplement: 41388_2023_2901_MOESM1_ESM.pdf [file 41388_2023_2901_MOESM1_ESM.pdf]
