# Supplementary material for: Glucocorticoid treatment influences prostate cancer cell growth and the tumor microenvironment via altered glucocorticoid receptor signaling in prostate fibroblasts
Source: PubMed Central journal article supplement (PMC10798901; doi:10.1038/s41388-023-02901-5), 2023-11-29
Supplement: 41388_2023_2901_MOESM2_ESM.pdf [file 41388_2023_2901_MOESM2_ESM.pdf]

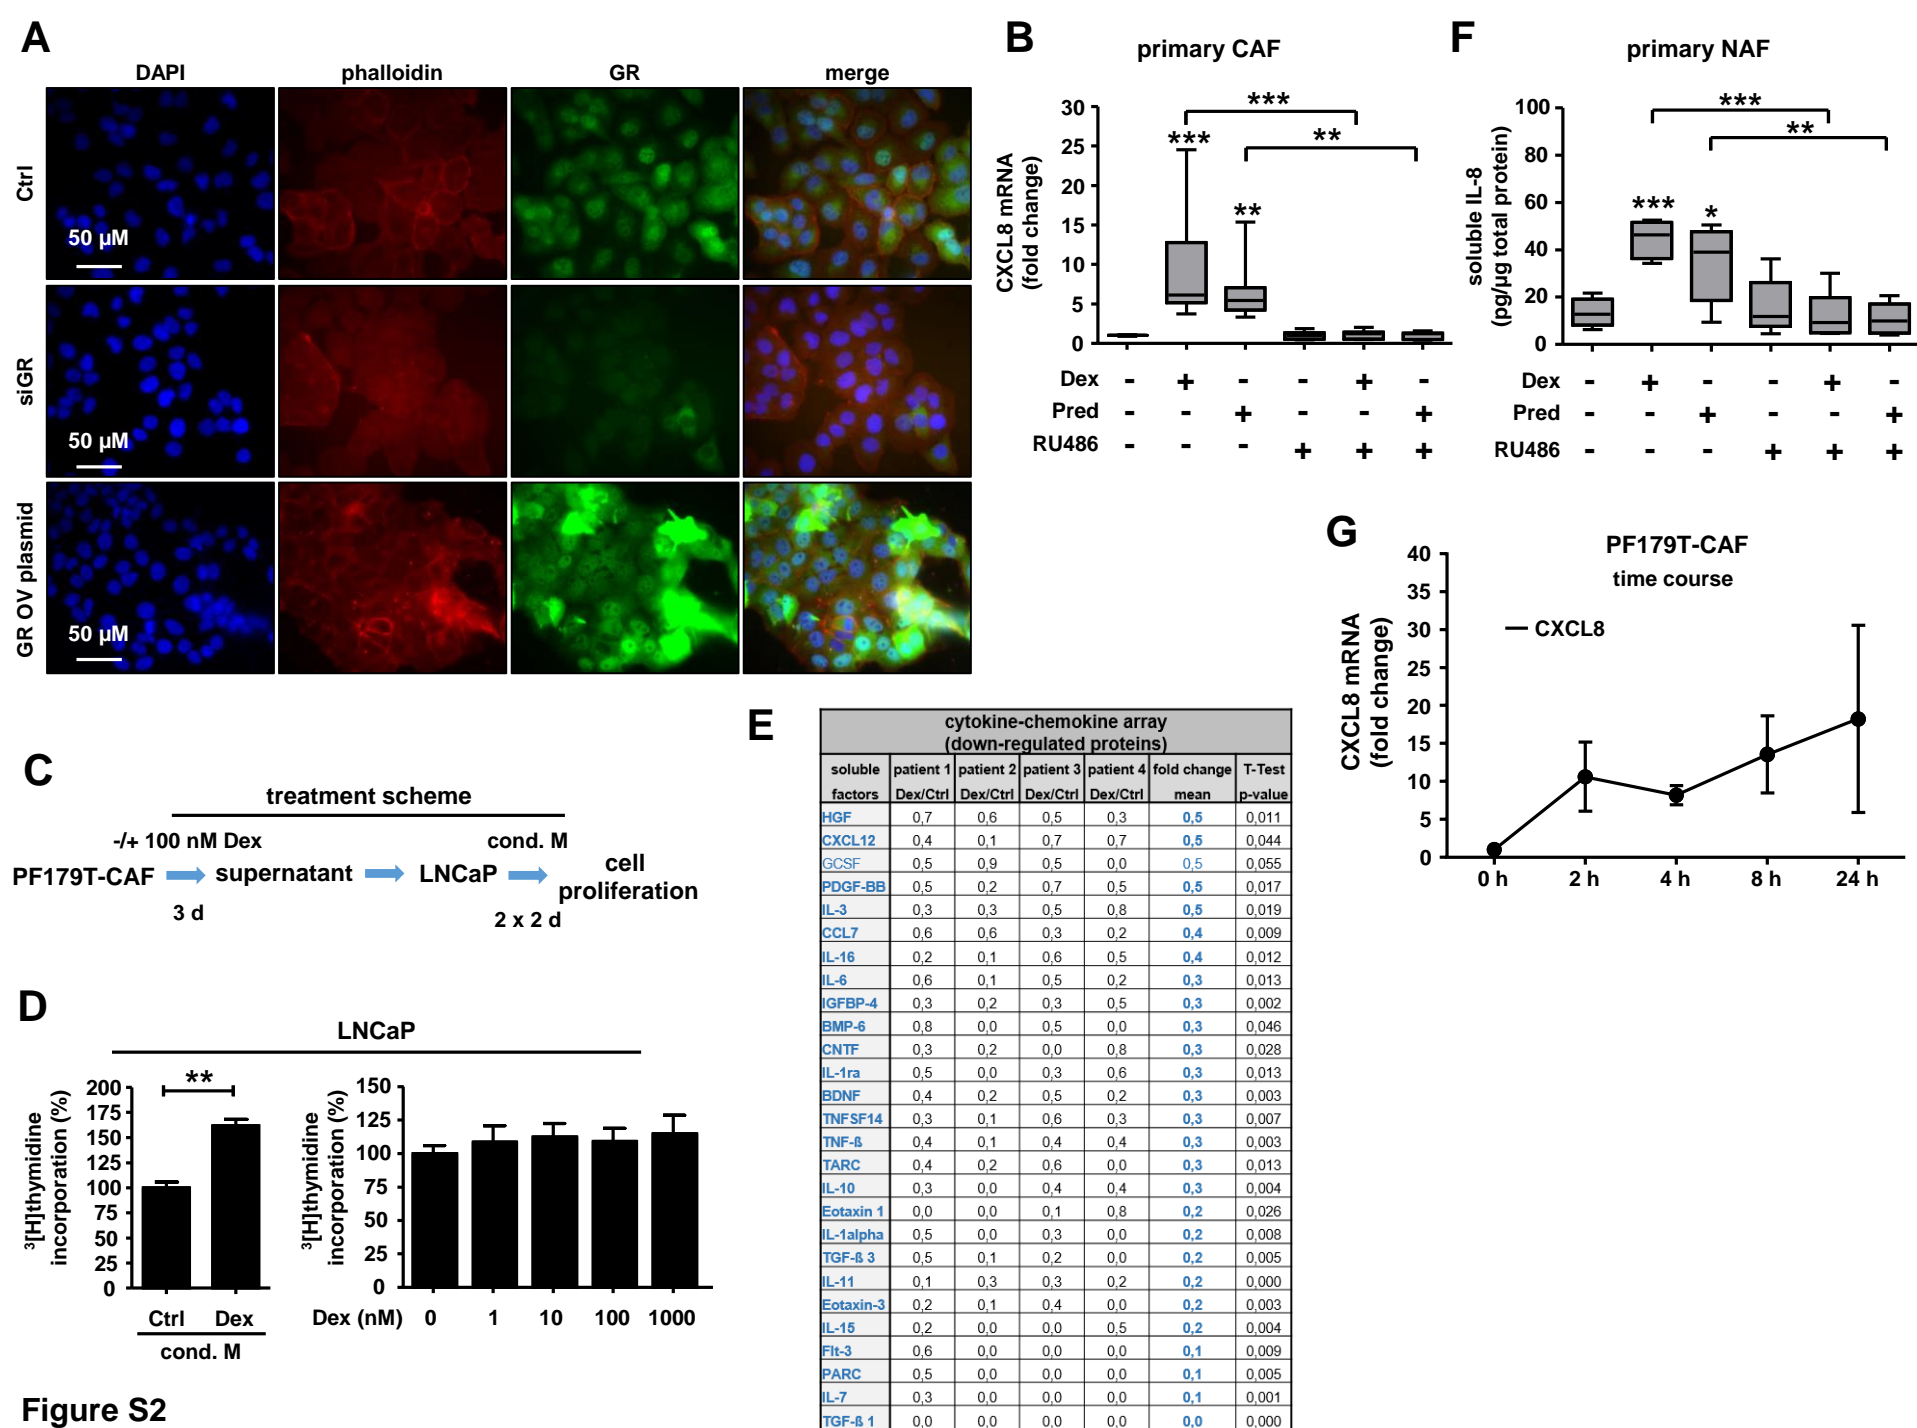

Figure S2
